# Supplementary material for: The dichapetalins and dichapetalin-type compounds: structural diversity, bioactivity, and future research perspectives
Source: Royal Society of Chemistry journal article supplement (doi:10.1039/d3np00039g), 2024-01-01
Supplement: d3np00039g1.xlsx [file d3np00039g1.xlsx]

## Sheet: Sheet1
Compound name	Compd No	C17 side chain	MW			Cell lines (IC50/EC50 uM)
				MF	HCT-116		WM266-4		HL-60		MCF-7		A549		SW480		CEM		Jurkat		SMMC-7721		NAMALWA		Hep G2		MIA PaCa2		SU86.86		YAPC		BxPC3		KM-12		OVcAR-3		SKOV-3		NCI-H460		T47D		HOP-62		Colo-205		TK10
						uM		uM		uM		uM		uM		uM		uM		uM		uM		uM		uM		uM		uM		uM		uM		uM		uM		uM		uM		uM		uM		uM
7-dehydrodichapetalin E	3	methyl ester	594	C39H46O5					10.2 uM	10.2	21.0 uM	21	17.6 uM	17.6	>40 uM	>40					24.8 uM	24.8
7-dehydrodichapetalin G	4	methyl ester	644	C40H52O7
Dichapetalin Z	5	methyl ester	794	C48H58O10
Dichapetalin A	1	lactone	584	C38H48O5	2.5x10-7 M	0.25	1.7x10-5 M	17	1.1x10-5 M	11			1.2x10-6 M	1.2			9.62 uM	9.62	2.97 uM	2.97			3.0x10-7 M	0.3									3.0x10-6 M	3	8.7x10-6 M	8.7	1.0x10-5 M	10	8.6x10-7 M	0.86	1.4x10-6 M	1.4	2.3x10-6 M	2.3	9.1x10-7 M	0.91	1.2x10-5 M	12	1.2x10-5 M
Dichapetalin N	6	lactone	582	C38H46O5	9.2x10-8 M	0.092	1.5x10-6 M	1.5
Dichapetalin O	7	lactone	588	C38H52O5	8.9x10-7 M	0.89	8.4x10-6 M	8.4
(+)-songbodichapetalin	8	lactone	658	C40H50O8
dichapegenin A	38	lactone	584	C38H48O5									3 uM	3									0.18 uM	0.18	3.7 uM	3.7
dichapegenin B	39	lactone	584	C38H48O5									2.4 uM	2.4									0.078 uM	0.078	7 uM	7
dichapegenin C	40	lactone	582	C38H46O5									2.8 uM	2.8									0.15 uM	0.15	2.6 uM	2.6
dichapegenin D	41	lactone	582	C38H46O5									2 uM	2									0.067 uM	0.067	2.1 uM	2.1
dichapegenin E	49	lactone	616	C38H48O7									>10 uM	>10									4.6 uM	4.6	>10 uM	>10
dichapegenin F	50	lactone	616	C38H48O7									>10 uM	>10									4.6 uM	4.6	>10 uM	>10
dichapegenin G	51	lactone	616	C38H48O7									4 uM	4									5.6 uM	5.6	6.6 uM	6.6
dichapegenin H	52	lactone	616	C38H48O7									4 uM	4									5.6 uM	5.6	6.6 uM	6.6
dichapegenin I	53	lactone	614	C38H46O7									5.9 uM	5.9									3.7 uM	3.7	6.6 uM	6.6
dichapegenin J	54	lactone	614	C38H46O7									5.9 uM	5.9									3.7 uM	3.7	6.6 uM	6.6
dichapegenin K	55	lactone	614	C38H46O7									>10 uM	>10									7.8 uM	7.8	>10 uM	>10
dichapegenin L	56	lactone	614	C38H46O7									>10 uM	>10									7.8 uM	7.8	>10 uM	>10
dichapegenin M	59	lactone	598	C38H46O6									>10 uM	>10									>10 uM	>10	>10 uM	>10
dichapegenin N	60	lactone	598	C38H46O6									6.9 uM	6.9									5 uM	5	6 uM	6
dichapegenin O	61	lactone	596	C38H44O6									5.1 uM	5.1									3.9 uM	3.9	4.2 uM	4.2
dichapegenin Q	64	lactone	614	C38H46O7									>10 uM	>10									9.8 uM	9.8	>10 uM	>10
dichapegenin R	65	lactone	614	C38H46O7									>10 uM	>10									8.9 uM	8.9	>10 uM	>10
dichapegenin T	66	lactone	612	C38H44O7									>10 uM	>10									>10 uM	>10	>10 uM	>10
dichapelonin A	42	lactone	584	C38H48O5					0.28 uM	0.28			1.8 uM	1.8													0.93 uM	0.93
dichapelonin B	43	lactone	614	C39H50O6					0.36 uM	0.36			1.2 uM	1.2													0.39 uM	0.39	1.7 uM	1.7	>10 uM	>10
dichapelonin C	44	lactone	568	C38H48O4					0.35 uM	0.35			2.8 uM	2.8													0.67 uM	0.67	1.6 uM	1.6	6.7 uM	6.7
dichapelonin D	45	lactone	582	C38H46O5					1.7 uM	1.7			2.2 uM	2.2													0.77 uM	0.77
dichapelonin E	46	lactone	586	C38H50O5					1 uM	1			3.8 uM	3.8													0.96 uM	0.96
dichapelonin F	47	lactone	584	C38H48O5					3.3 uM	3.3			9.2 uM	9.2													>10 uM	>10
dichapelonin G	48	lactone	582	C38H46O5					1.3 uM	1.3			3.7 uM	3.7													2.8 uM	2.8
dichapelonin H	57	lactone	646	C39H50O8					>10 uM	>10			>10 uM	>10
dichapelonin I	58	lactone	646	C39H50O8					>10 uM	>10			>10 uM	>10
dichapelonin J	62	lactone	598	C38H46O6					>10 uM	>10			>10 uM	>10
dichapelonin K	63	lactone	614	C38H46O7
dichapelonin L	67	lactone	614	C38H46O7					>10 uM	>10			>10 uM	>10
dichapelonin M	68	lactone	616	C38H48O7					>10 uM	>10			9.4 uM	9.4
dichapelonin N	69	lactone	660	C39H48O9					>10 uM	>10			>10 uM	>10
dichagelinoid A	73	lactone	618	C38H50O7					0.38umol/L	0.38			1.00umol/L	1
dichagelinoid B	74	lactone	618	C38H50O7					0.57umol/L	0.57			1.35umol/L	1.35
dichagelinoid C	75	lactone	616	C39H52O6					4.23umol/L	4.23			1.22umol/L	1.22
dichagelinoid D	76	lactone	600	C38H48O6					>10umol/L	>10			>10umol/L	>10
dichagelinoid E	77	lactone	600	C38H48O6					>10umol/L	>10			>10umol/L	>10
dichapetalin Q	10	hemiacetal	588	C38H52O5	2.5x10-6 M	2.5	2.7x10-5 M	27
21-dehydrodichapetalin Q	11	hemiacetal	586	C38H50O5
2’α-hydroxy-21-dehydrodichapetalin Q	12	hemiacetal	602	C38H50O6
7,21-dehydrodichapetalin Q	13	hemiacetal	584	C38H48O5
pacidusin A	14	hemiacetal	602	C39H54O5					12.25 uM	12.25	16.6 uM	16.6	17 uM	17	18.92 uM	18.92					18.49 uM	18.49
pacidusin B	15	hemiacetal	602	C39H54O5					16.12 uM	16.12	17.05 uM	17.05	22.38 uM	22.38	16.36 uM	16.36					13.19 uM	13.19
pacidusin C	16	hemiacetal	602	C39H54O5					3.381 uM	3.381	12.48 uM	12.48	11.67 uM	11.67	18.27 uM	18.27					9.484 uM	9.484
pacidusin D	17	hemiacetal	602	C39H54O5					5.017 uM	5.017	15.43 uM	15.43	17.05 uM	17.05	16.53 uM	16.53					12.93 uM	12.93
dichapelonin O	70	hemiacetal	602	C38H50O6					>10 uM	>10			1.1 uM	1.1
dichapetalin M	2	spiroketal-C25 acetate	672	C40H48O9	9.9x10-9 M	0.0099	7.8x10-8 M	0.078
25-de-O-acetyldichapetalin M	18	spiroketal-C25 acetate	630	C38H46O8
dichapetalin P	19	spiroketal-C25 acetate	656	C40H48O8	5.8x10-8 M	0.058	2.3x10-7 M	0.23
7-hydroxydichapetalin P	20	spiroketal-C25 acetate	658	C40H50O8					29.72 uM	29.72							23.92 uM	23.92	2.66 uM	2.66
22-deoxydichapetalin P	21	spiroketal-C25 acetate	640	C40H48O7
24-hydroxy-22-deoxydichapetalin P	22	spiroketal-C25 acetate	656	C40H48O8
25-de-O-acetyldichapetalin P	23	spiroketal-C25 acetate	614	C38H46O7
22-deoxy-25-de-O-acetyldichapetalin P	24	spiroketal-C25 acetate	598	C38H46O6
dichapetalin S	25	spiroketal-C25 acetate	600	C38H48O6	4.5x10-7 M	0.45	1.3x10-6 M	1.3
dichapelonin P	71	spiroketal-C25 acetate	658	C40H50O8
dichapelonin Q	72	spiroketal-C25 acetate	658	C40H50O8					>10 uM	>10			3.3 uM	3.3
phainanoid A	78	spiroketal-C25 acetate	626	C38H42O8
phainanoid B	79	spiroketal-C25 acetate	642	C38H42O9
phainanoid C	80	spiroketal-C25 acetate	656	C39H44O9
phainanoid D	81	spiroketal-C25 acetate	756	C44H52O11
phainanoid G	82	spiroketal-C25 acetate	684	C40H44O10					10.036 uM	10.036			20.9 uM	20.9
phainanoid I	83	spiroketal-C25 acetate	642	C38H42O9					2.34 uM	2.34			32.802 uM	32.802
phainanolide A	87	spiroketal-C25 acetate	744	C42H48O12					0.079 uM	0.079			8.957 uM	8.957
dichapetalin T	26	spiroketal-C25 alkyloxy	762	C47H54O9
dichapetalin U	27	spiroketal-C25 alkyloxy	762	C47H54O9					>40 uM	>40	8.2 uM	8.2	26.8 uM	26.8	>40 uM	>40					>40 uM	>40
24-hydroxydichapetalin U	28	spiroketal-C25 alkyloxy	778	C47H54O10
dichapetalin V	29	spiroketal-C25 alkyloxy	778	C47H54O10					5.1 uM	5.1	3.5 uM	3.5	3 uM	3	21 uM	21					18.7 uM	18.7
6α-hydroxydichapetalin V	30	spiroketal-C25 alkyloxy	794	C47H54O11
22-deoxy-4’’-methoxydichapetalin V	31	spiroketal-C25 alkyloxy	792	C48H56O10
dichapetalin W	32	spiroketal-C25 alkyloxy	792	C48H56O10					>40 uM	>40	40 uM	40	40 uM	40	>40 uM	>40					>40 uM	>40
4’’-demethoxydichapetalin W	33	spiroketal-C25 alkyloxy	762	C47H54O9
4’’-demethoxy-7-dihydrodichapetalin W	34	spiroketal-C25 alkyloxy	764	C47H56O9
dichapetalin X	35	spiroketal-C25 alkyloxy	702	C42H54O9					5.56 uM	5.56							3.14 uM	3.14	1.8 uM	1.8
dichapetalin Y	36	spiroketal-C25 alkyloxy	760	C47H52O9
24-deoxydichapetalin Y	37	spiroketal-C25 alkyloxy	762	C47H54O9
phainanoid E	84	spiroketal-C25 alkyloxy	758	C43H50O12
phainanoid F	85	spiroketal-C25 alkyloxy	772	C44H52O12
phainanoid H	86	spiroketal-C25 alkyloxy	742	C43H50O11					0.025 uM	0.025			11.266 uM	11.266
dichapetalin R	9	Other	622	C38H54O7	4.2x10-6 M	4.2	3.1x10-5 M	31
Notes: Compounds from same article have common colour code. See below for references.
Under the Cell lines, the first column represents original units as contained in the articles. In column 2, units are converted to uM where necessary. Otherwise, they are are repeated.
	S-X. Jing, S-H. Luo, C-H. Li, J. Hua, Y-L. Wang, X-M. Niu, X-N. Li, Y. Liu, C-S. Huang, Y. Wang and S-H. Li, J. Nat. Prod., 2014, 77, 882-893.
	D-L. Zhang, M. Li, W-F. Xu, H. Yu, P-F. Jin, S-Y. Li and S-A Tang, Fitoterapia, 2021, 151, 104868
	C. Long, Y. Aussagues, N. Molinier, L. Marcourt, L. Vendier, A. Samson, V. Poughon, P. B. Chalo, F. Ausseil, F. Sautel. P. B. Arimondo and G. Massiot, Phytochem., 2013, 94, 184
	B. Zhou, X. H. Gao, M. M. Zhang, C-Y. Zheng, H. C. Liu and J. M. Yue, Chem. Sci., 2021, 2(28), 9831
	B. Zhou, X. H. Gao, M. M. Zhang, H. C. Liu, and J. M. Yue, J. Nat. Prod., 2023, 86(1), 209
		X-H. Gao, X-Y. Wang, J-S. Zhou, Y. Zhang, H-C. Liu, B. Zhou and J-M. Yue, Chin. J. Chem. 2022, 40, 2531
	H-C. Geng, H-T. Zhu, W-N. Yang, D. Wang, C-R. Yang and Y-J Zhang, Bioorg. Chem., 2021, 114, 105125
	Y-Y. Fan, H. Zhang, Y. Zhou, H-B. Liu, W. Tang, B. Zhou, J-P. Zuo and J. M. Yue, J. Am. Chem. Soc., 2015, 137, 138
	Y. Y. Fan, L. S. Gan, H. C. Liu, H. Li, C. H. Xu, J. P. Zuo, J. Ding and J. M. Yue, Org. Lett., 2017, 19(17), 4580
[truncated: 5 more columns]
